# Supplementary material for: Food insecurity increases energetic efficiency, not food consumption: an exploratory study in European starlings
Source: PeerJ journal article supplement (doi:10.7717/peerj.11541), 2021-05-28

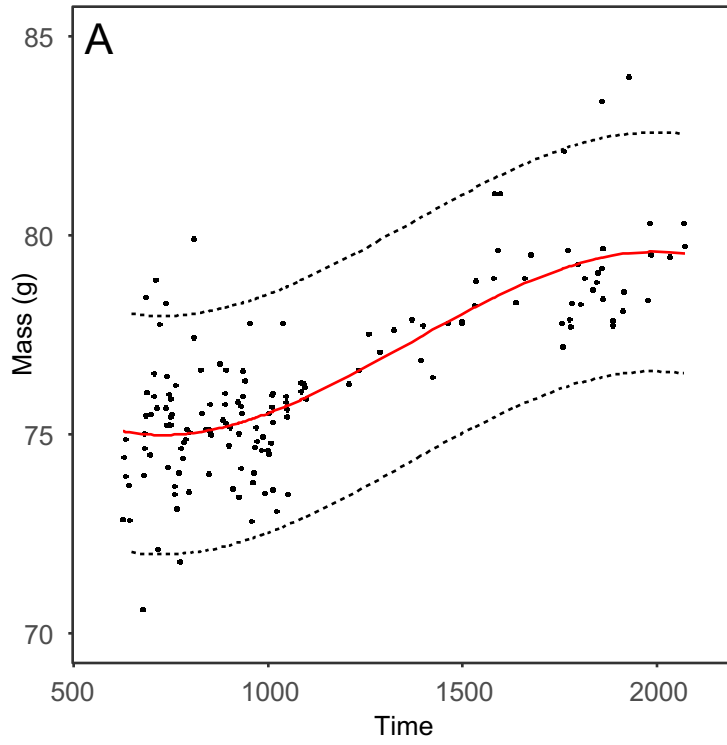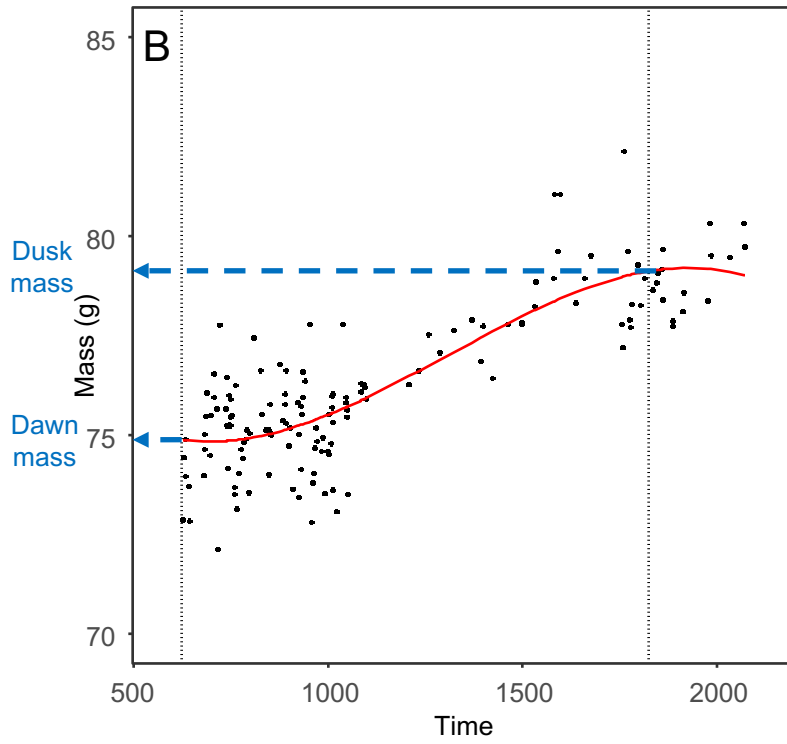

Supplement: Figure_S1_mass_methods.pdf [file Figure_S1_mass_methods.pdf]
