# Supplementary material for: Food insecurity increases energetic efficiency, not food consumption: an exploratory study in European starlings
Source: PeerJ. 2021 May 28;9:e11541. doi: 10.7717/peerj.11541 (PMC8166238; doi:10.7717/peerj.11541)
Supplement: Supplemental Information 5 [file peerj-09-11541-s005.docx]

**Table S2**. Summary of linear mixed models of effects of food insecurity on dawn1 mass (g).

| Expt. | Random effects | Treatment effect2 | Parameter estimate (g)3 | 95% CI (g) | Test statistic | | p-value |
| --- | --- | --- | --- | --- | --- | --- | --- |
|  |  |  |  |  | Type df | Value |  |
| 1 | Aviary/bird | Overall4 |  |  | F2,142 | 0.91 | 0.404 |
|  |  | FI v. FS1 | βFI = -0.06 | -0.89 to 0.76 | t142 | -0.15 | 0.878 |
|  |  | FS2 v. FS1 | βFS2 = 0.53 | -0.45 to 1.52 | t142 | 1.05 | 0.294 |
|  |  | FI v. FS2 | βFI = -0.59 | -1.48 to 0.29 | t142 | -1.32 | 0.291 |
| 2 | Bird | Overall | βFI = 2.06 | 1.25 to 2.87 | F1,70 | 25.37 | <0.001*** |
| 3 | Bird | Overall |  |  | F2,152 | 0.10 | 0.909 |
|  |  | FI v. FS1 | βFI = 0.18 | -0.62 to 0.98 | t152 | 0.44 | 0.664 |
|  |  | FS2 v. FS1 | βFS2 = 0.10 | -0.61 to 0.80 | t152 | 0.27 | 0.791 |
|  |  | FI v. FS2 | βFI = 0.08 | -0.62 to 0.79 | t152 | 0.23 | 0.819 |
| 4 | Aviary/bird | Overall |  |  | F2,115 | 2.14 | 0.123 |
|  |  | FIlow v. FS1 | βFIlow = 0.70 | -0.16 to 1.57 | t115 | 1.59 | 0.115 |
|  |  | FShigh v. FS1 | βFIhigh = 0.93 | -0.02 to 1.87 | t115 | 1.91 | 0.059 |
|  |  | FIhigh v. FIlow | βFIhigh = 0.22 | -0.72 to 1.16 | t115 | 0.46 | 0.646 |

Notes:

1. The mass before birds start foraging for the day when their gut is still empty. Unit of analysis is bird day.
2. The reference category is always given second.
3. For comparisons involving food insecurity the parameter estimates are always expressed such that a positive number means that birds gained weight under greater FI.
4. Overall tests: type III ANOVA with Satterthwaite’s method.
5. * p < 0.05, ** p < 0.01, *** p < 0.001.
